# Supplementary material for: The tumor suppressor TMEM127 regulates insulin sensitivity in a tissue-specific manner
Source: PubMed Central journal article supplement (PMC6797792; doi:10.1038/s41467-019-12661-0), 2019-10-17
Supplement: 41467_2019_12661_MOESM1_ESM.pdf [file 41467_2019_12661_MOESM1_ESM.pdf]

## Supplementary Information

The tumor suppressor TMEM127 regulates insulin sensitivity in a tissue-specific manner

Srikantan et al.



Supplementary Fig 1. **Global deletion of Tmem127 impairs growth and results in low adiposity** A) TMEM127 expression in different human tissues by RNA seq from the GTEX project (ENSG00000135956.4, data represent Log10 transformed TPM(transcript per million)+1 values; plots show median and 25<sup>th</sup> and 75<sup>th</sup> percentiles, points are outliers (above 1.5x the interquartile range), obtained from the GTEX portal, V7 release (including 11,688 samples from 714 donors) on 06/12/2019); B) Relative Tmem127 expression in tissues from WT and Tmem127 KO mice (n=7 and 12 per genotype, respectively), measured by RT-PCR and normalized to the Tfiib gene expression; C) Body weight of female wild-type (WT) and Tmem127 knockout (KO) mice (n=8 and 10 per genotype, respectively) from 6-22 months of age; D) fat and lean mass of male WT and KO mice at the indicated ages (n=5-14 per genotype, respectively); E) fat mass/lean mass ratio of female WT and KO mice across ages (n=8 or 10 per genotype, respectively); F) Plasma levels of norepinephrine and epinephrine of adult male WT (n=6) and KO (n=7) mice measured by gas chromatography/mass spectrometry (GC/MS); G) Western blot of adrenal lysates of WT and KO adult male mice (n=4 per genotype), probed for mTORC1 targets S6K (phosphorylated S6K, pS6K and total S6K) and p-4EBP1; TMEM127 and loading control antibodies; H) Plasma levels of Fgf21 of adult male WT and KO mice under regular fed conditions, after 24 h fasting and after 4h refeeding (n=6 per genotype); I) Relative inguinal (iWAT), epididymal (eWAT) and brown adipose tissue (BAT) mRNA expression of the Ucp1 gene expression in adult WT and KO mice (n=10 or 12 per genotype, respectively) measured by real-time PCR (RT-PCR) and normalized to Tfiib gene; J) Representative HE-stained sections of inguinal WAT of adult male WT and KO mice (scale bar is 100 $\mu$ M); K) Diameter of the designated adipocytes from adult male WT and KO mice (n=6 per genotype). Data were analyzed by Student's t-test. Values are expressed as mean +/- s.e.m. \*P<0.05; \*\*P<0.01; \*\*\*P<0.001. Adult mice were 9-12months of age. Source data are provided as a Source Data file.

Supplementary Table 1. Pre-birth and neonatal *Tmem127* knockout mouse fitness based on genotype distribution

| Age     | Total number of litters | Total number of embryos | KOs (n) | Hets (n) | WT (n) | P value |
|---------|-------------------------|-------------------------|---------|----------|--------|---------|
| E13.5   | 44                      | 299                     | 78      | 137      | 84     | 0.66    |
| E18/E19 | 9                       | 70                      | 21      | 30       | 19     | 0.63    |
| P0      | 23                      | 154                     | 27      | 95       | 32     | 0.03    |

E=embryonic day; P=postnatal day; KO=knockout; WT=wild-type; Hets= heterozygotes; p-value: Z-statistic, significance level

Supplementary Table 2. Perinatal (pre- and post-birth) body weight of *Tmem127* knockout mice

| Age   | KO       |      |    | WT       |      |    | p value  |
|-------|----------|------|----|----------|------|----|----------|
|       | mean (g) | SEM  | n  | mean (g) | SEM  | n  |          |
| E18.5 | 1.00     | 0.06 | 8  | 1.02     | 0.07 | 8  | 0.55     |
| P7    | 3.28     | 0.21 | 10 | 3.79     | 0.12 | 18 | 0.03     |
| P14   | 5.22     | 0.26 | 10 | 6.24     | 0.17 | 18 | 0.00     |
| P21   | 6.60     | 0.47 | 10 | 8.85     | 0.20 | 18 | < 0.0001 |
| P30   | 11.48    | 1.00 | 9  | 15.77    | 0.34 | 16 | < 0.0001 |
| P45   | 17.00    | 0.75 | 7  | 21.48    | 0.35 | 15 | < 0.0001 |
| P60   | 20.19    | 0.99 | 5  | 24.57    | 0.37 | 14 | < 0.0001 |

E=embryonic day; P=postnatal day; E=embryonic day; P=postnatal day; KO=knockout; WT=wild-type; Hets=heterozygotes; SEM=standard error of the means; p-value: Student's t-test

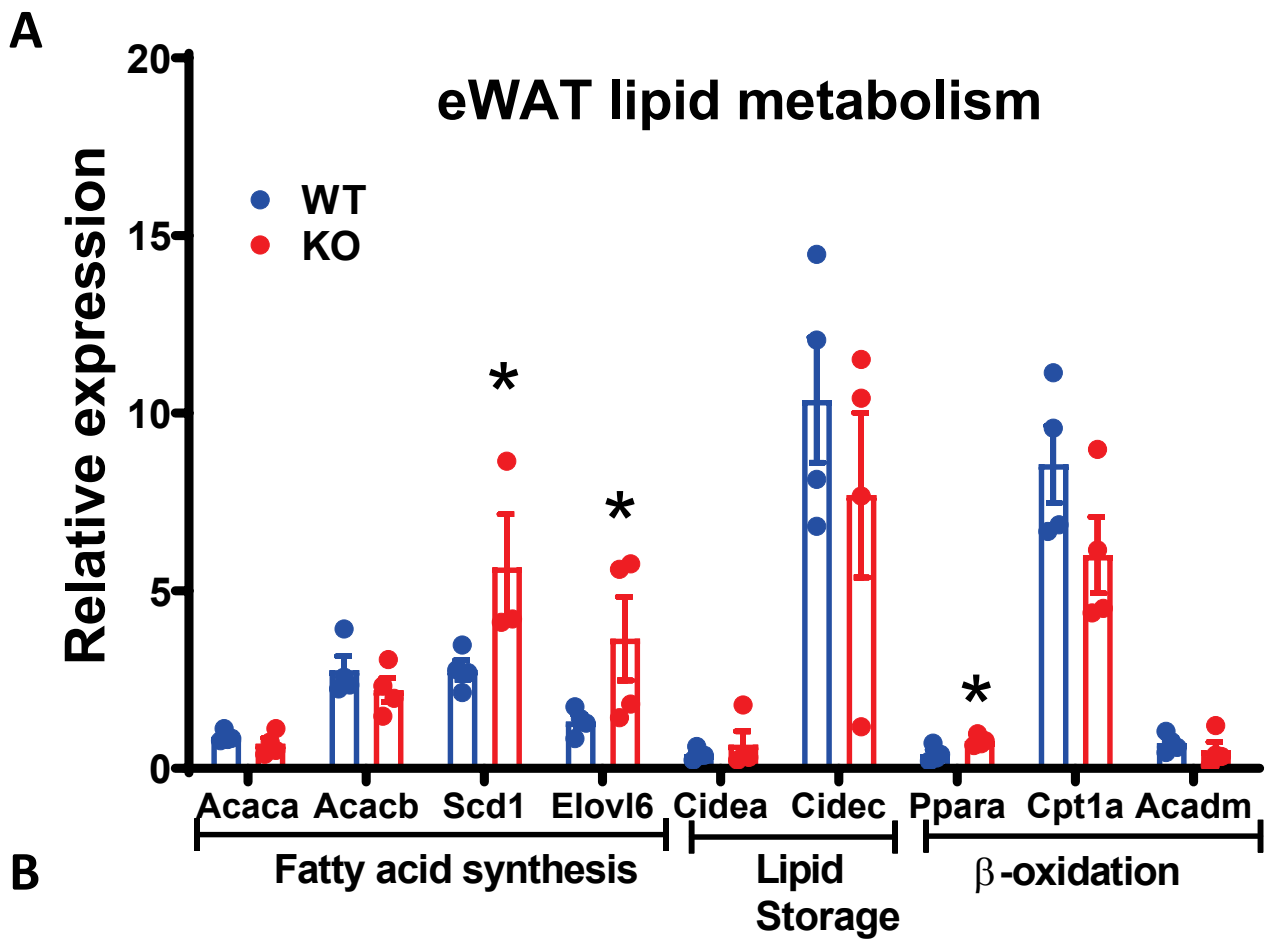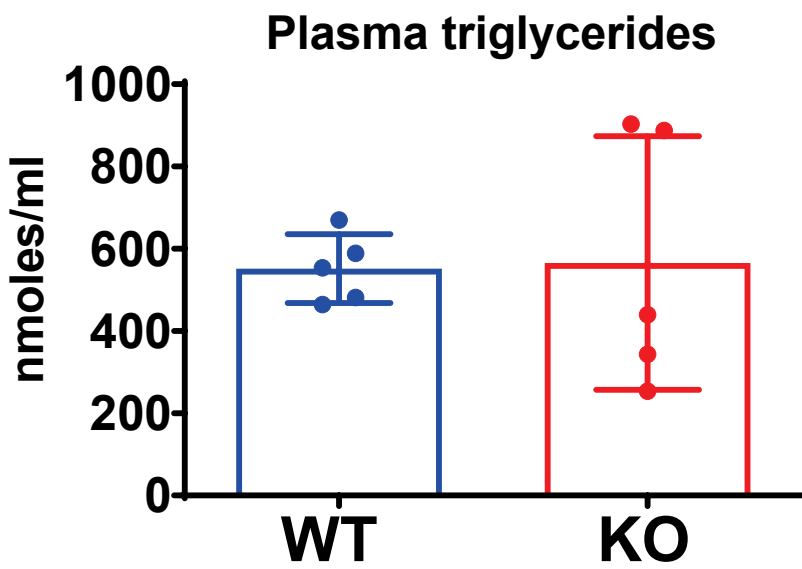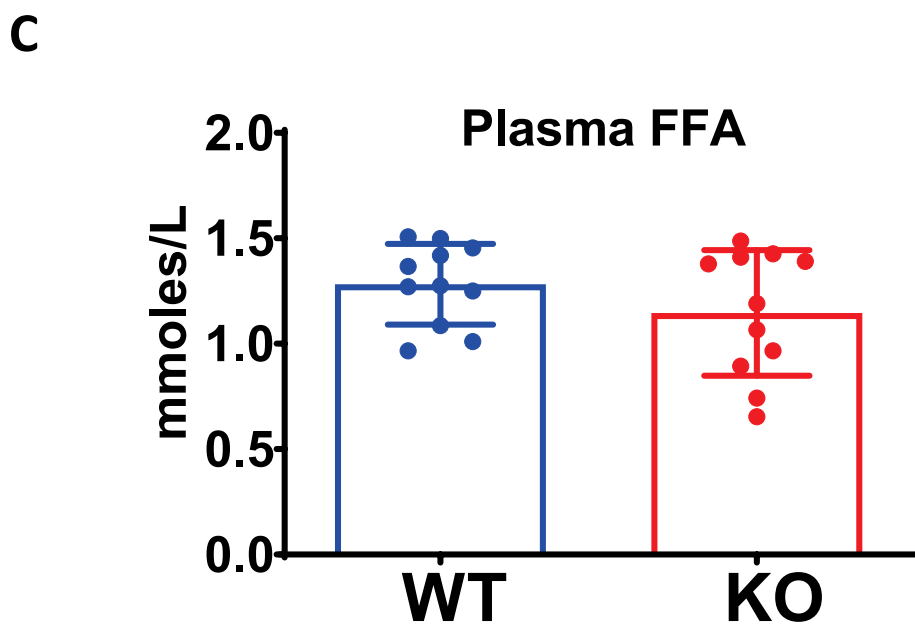

Supplementary Fig 2. **Global Tmem127 deletion impairs hepatic lipogenesis.** A) Relative eWAT mRNA expression of the indicated fatty acid synthesis, storage, oxidation and transport gene expression in adult WT and KO mice (n=10 or 12 per genotype, respectively) measured by real-time PCR (RT-PCR) and normalized to Tff1b gene; B) Plasma triglyceride content in fed adult WT and KO mice (n=5 per genotype); C) Plasma free fatty acids in fed adult WT and KO mice (n=13 per genotype). Data were analyzed by Student's t-test. Values are expressed as mean +/- s.e.m. \*P<0.05; \*\*P<0.01; \*\*\*P<0.001. Adult mice were 9-12months of age. Source data are provided as a Source Data file.

**A**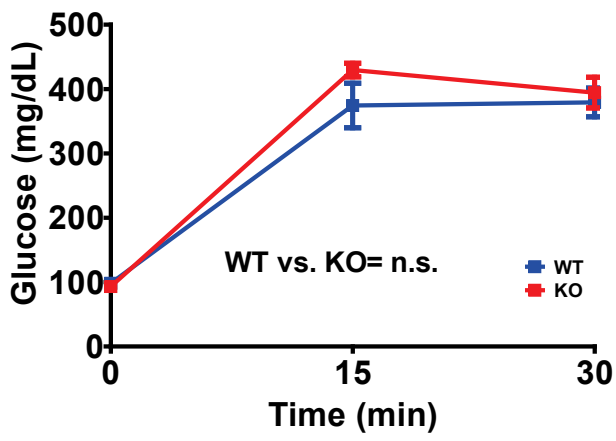**B**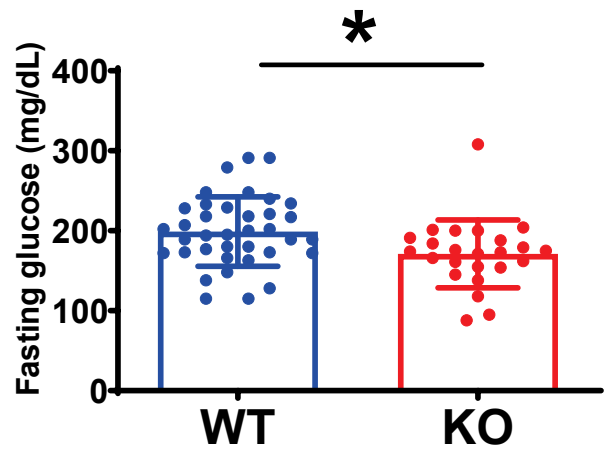**C**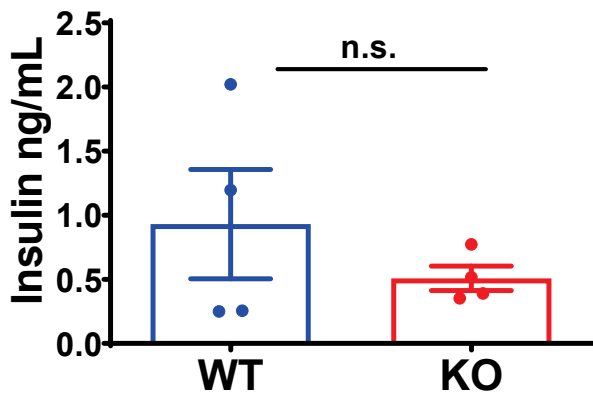**D**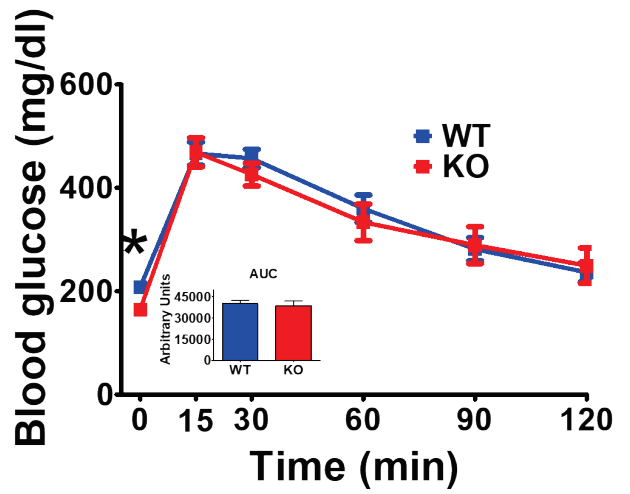**E**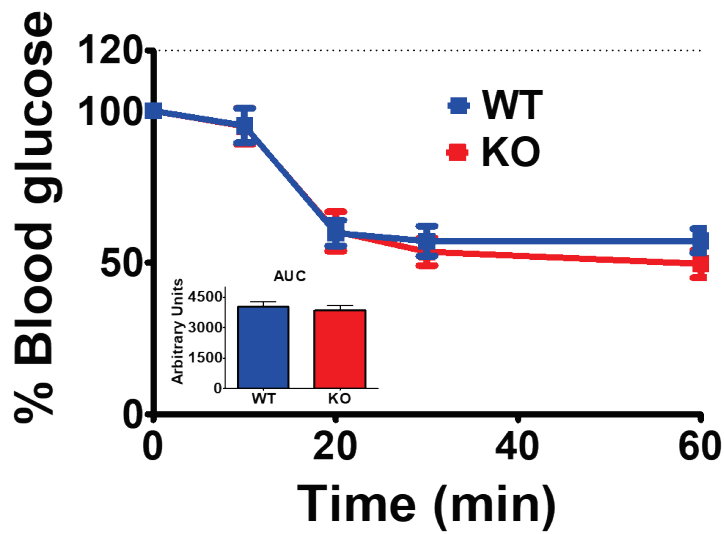



Supplementary Fig 3. **Tmem127 deletion leads to hypoinsulinemia and improved insulin tolerance.** A) Blood glucose levels from the GSIS test from Fig 2D-performed in adult male WT and KO mice (n=4 per genotype; B)Fasting (6 hours) blood glucose of 3-6 month-old (young) WT and Tmem127 KO male mice (n=37 and 24 per genotype, respectively); C) Fasting (6 hours) serum insulin of 3-6 month-old (young) WT and Tmem127 KO male mice (n=4 per genotype); D) Glucose tolerance test (GTT) and area under the curve (AUC, inset graph) of 3-6 month-old (young) WT and Tmem127 KO male mice (n=7 and 8 per genotype, respectively); E) Insulin tolerance test (ITT) and AUC (inset) of 3-6 month-old (young) WT and Tmem127 KO male mice (n=7 and 8 per genotype, respectively). Data were analyzed by Student's t-test or two-way ANOVA (in the case of GSIS). Values are expressed as mean +/- s.e.m. \*P<0.05; \*\*P<0.01; \*\*\*P<0.001. Adult mice were 9-12months of age. Source data are provided as a Source Data file.

**A**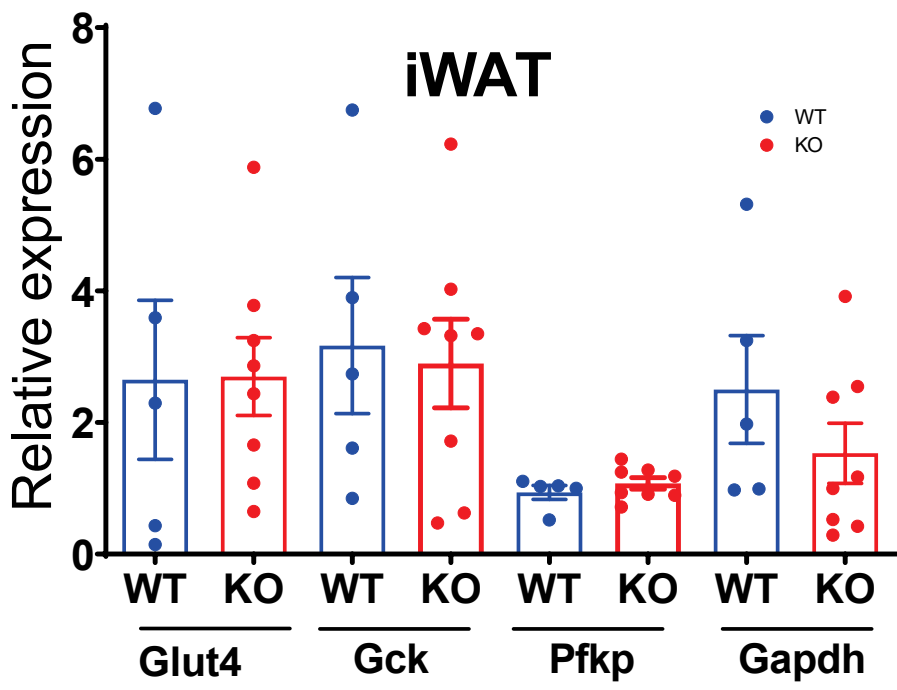**B**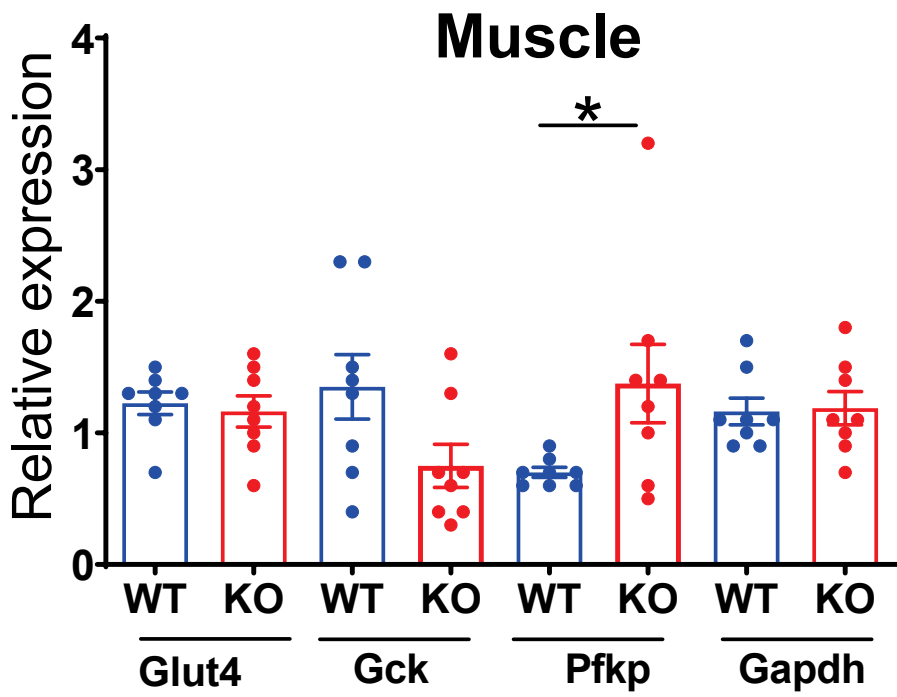

Supplementary Fig 4. **Tmem127 deletion decreases hepatic gluconeogenesis and increases insulin signaling.** A) Relative iWAT mRNA expression of the indicated glucose transporter, glycolysis and gluconeogenesis genes from adult WT and KO mice (n=5 or 8 per genotype, respectively); B) Relative muscle mRNA expression of the indicated glucose transporter, glycolysis and gluconeogenesis genes from adult WT and KO mice (n=7 or 8 per genotype, respectively). Data were analyzed by Student's t-test or two-way ANOVA (in the case of GSIS). Values are expressed as mean +/- s.e.m. \*P<0.05; \*\*P<0.01; \*\*\*P<0.001. Adult mice were 9-12months of age. Source data are provided as a Source Data file.

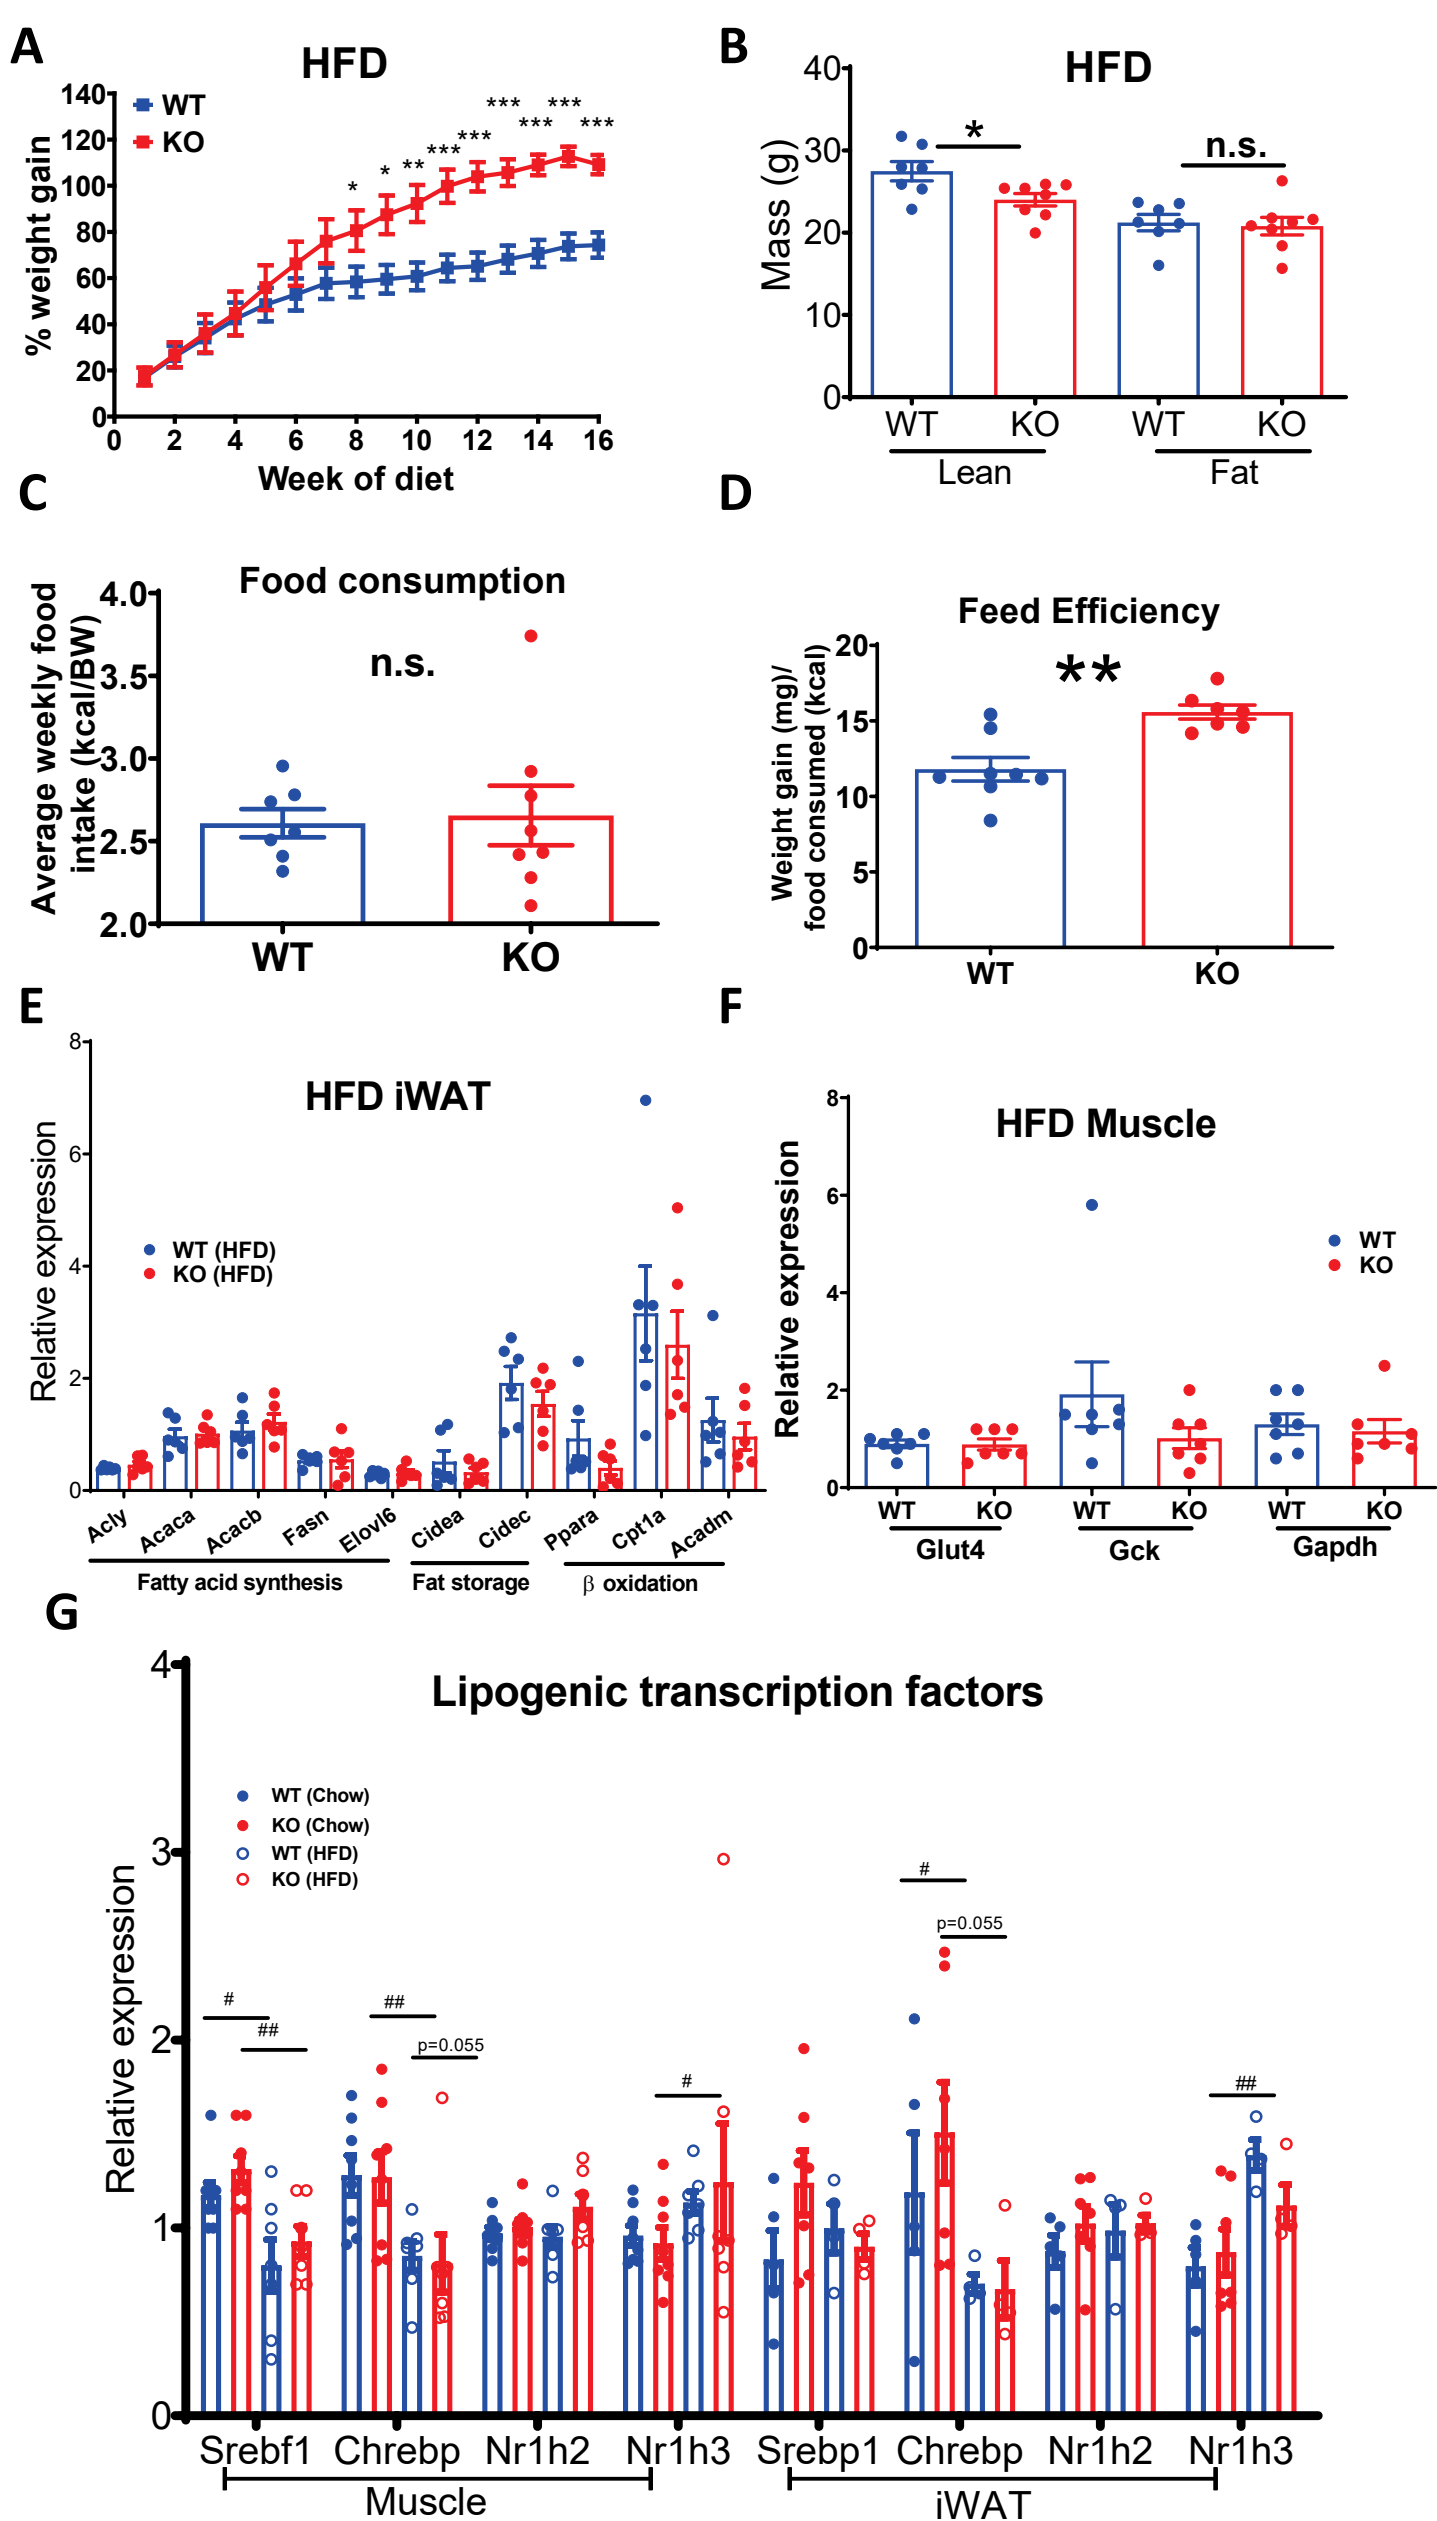

Supplementary Fig 5. **Tmem127 deletion protects against high-fat diet (HFD)-induced hepatic steatosis and insulin resistance.** A) Weight gain relative to start body weight of WT and Tmem127 KO male mice on a 60% kcal fat diet for 16 weeks (n=8 per genotype, starting age 3-5 months); B) Relative lean and fat mass of WT and KO mice after 16 weeks of HFD (n=7 or 8 per genotype, respectively); C) Average weekly calorie intake per body weight of singly housed WT and KO mice on a HFD (n=8 or 7 per genotype, respectively); D) Feed efficiency calculated as the weight gain per kcal food intake, averaged per week) of singly housed WT and KO mice on a HFD (n=8 per genotype); E) Relative iWAT mRNA expression of the indicated fatty acid synthesis, storage and oxidation gene expression from HFD-fed male WT and KO mice (n=8 per genotype, 9-11 mo-old) measured by RT-PCR; F) Relative muscle mRNA expression of the indicated glucose transport and metabolism gene expression from HFD-fed male WT and KO mice (n=7 per genotype, 9-11 mo-old) measured by RT-PCR; G) Relative muscle and iWAT mRNA expression of the indicated lipogenic transcription factor genes from chow or HFD-fed male WT and KO mice (n=8 per genotype, 9-11 mo-old); data were analyzed by Student's t-test. Srebf1, Chrebp values are significantly different per diet, but not per genotype in both tissues. Other values are non-significant. Data were analyzed by Student's t-test and/or ANOVA. Values are expressed as mean +/- s.e.m. \*P<0.05; \*\*P<0.01; \*\*\*P<0.001; # comparisons between diet; \* comparisons between genotype # or \*P<0.05; ## or \*\*P<0.01; ### or \*\*\*P<0.001. Source data are provided as a Source Data file.

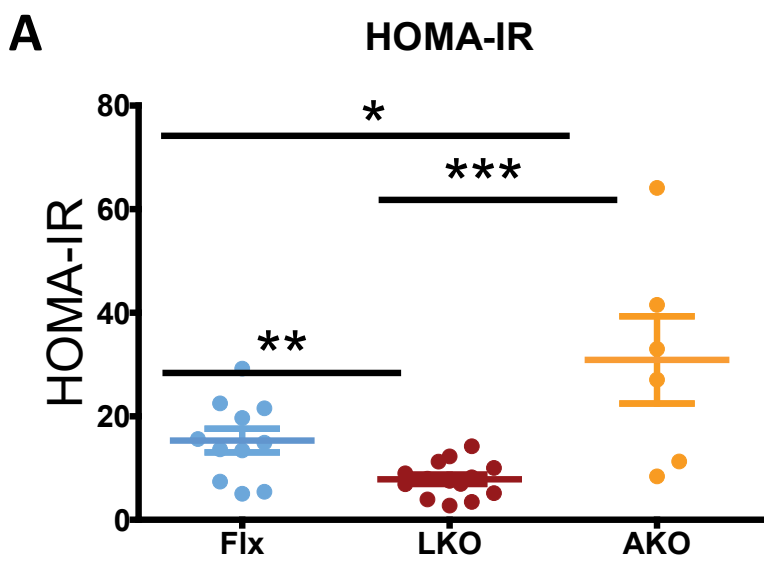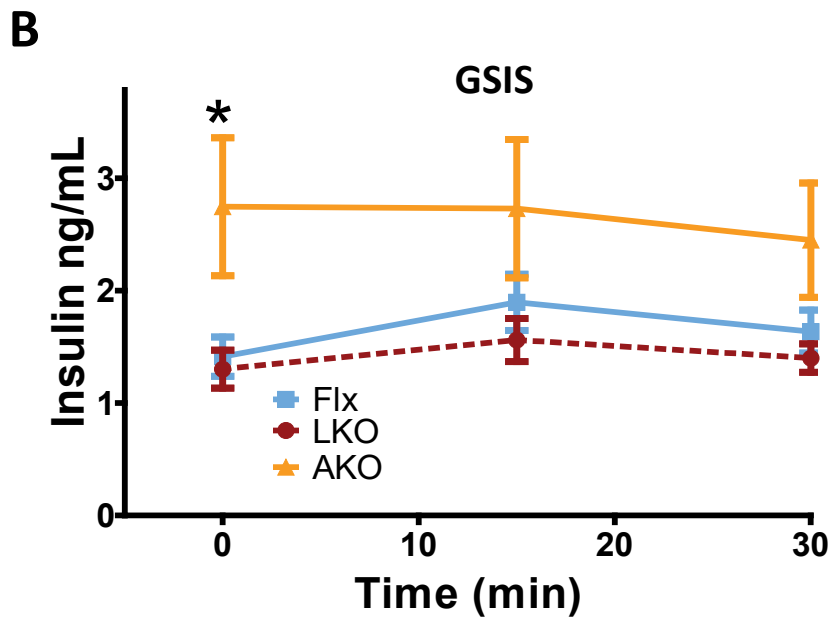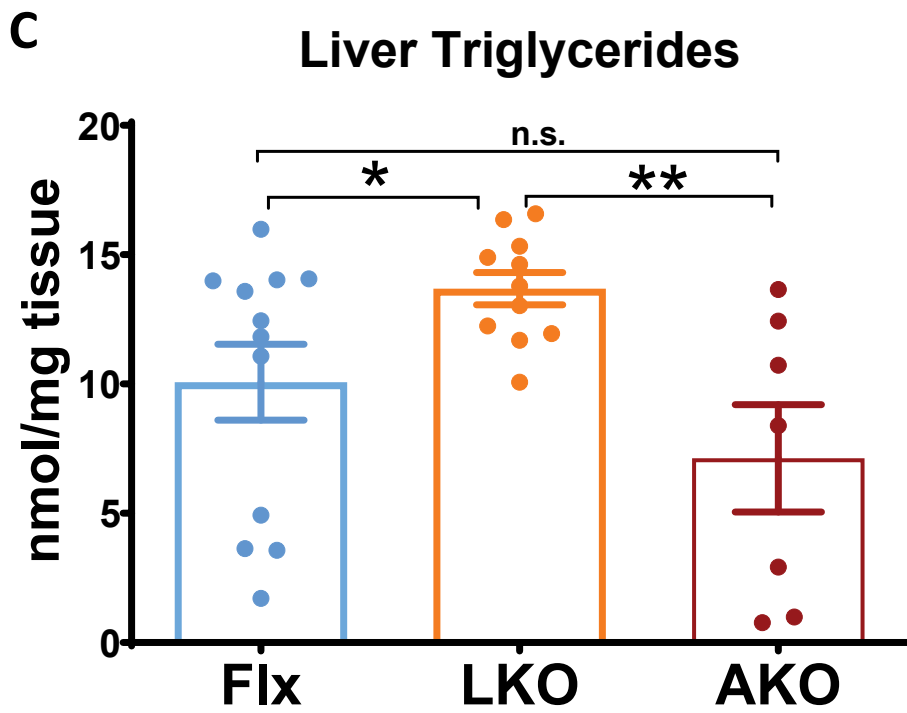

Supplementary Fig 6. **Liver-specific *Tmem127* deficient mice show improved glucose metabolism whereas adipose-specific *Tmem127* deficient mice are insulin resistant.** A) Homeostatic model assessment -insulin resistance index (HOMA-IR) of adult male Flx, LKO and AKO mice (n= 11 Flx, 14 LKO, 6 AKO), data were analyzed by Student's t-test. Values are expressed as mean +/- s.e.m. \*P<0.05; \*\*P<0.01; \*\*\*P<0.001. B) Glucose-stimulated insulin secretion (GSIS) of adult Flx, LKO and AKO mice (n=9 Flx, n=6 LKO, n=5 AKO); e); C) Liver triglyceride content of fed Flx, LKO and AKO (n=12, 11 and 7, respectively). Data were analyzed by ANOVA; \*p<0.05. Source data are provided as a Source Data file.

**A**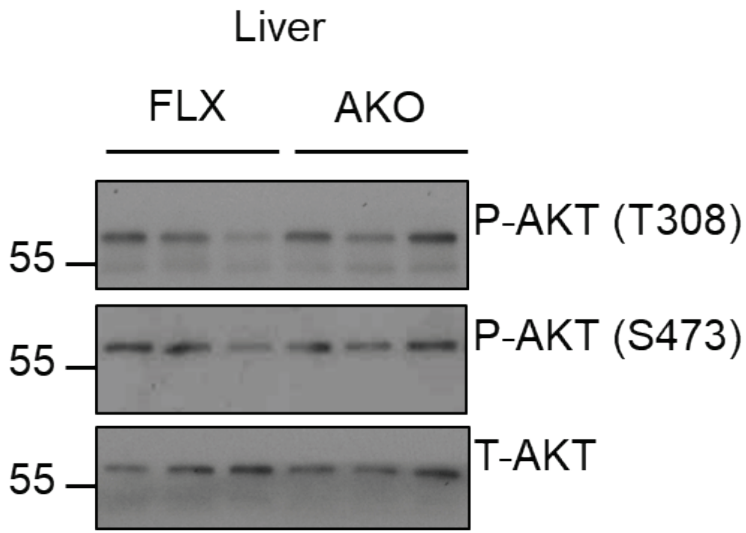**B**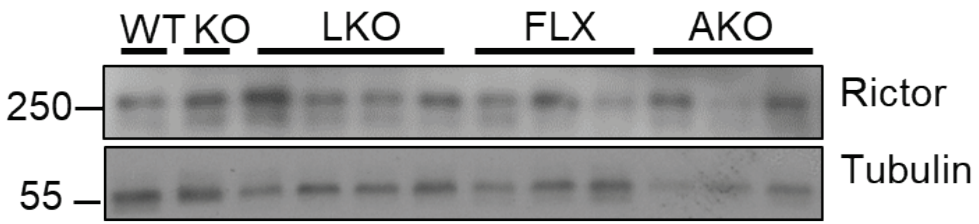**C**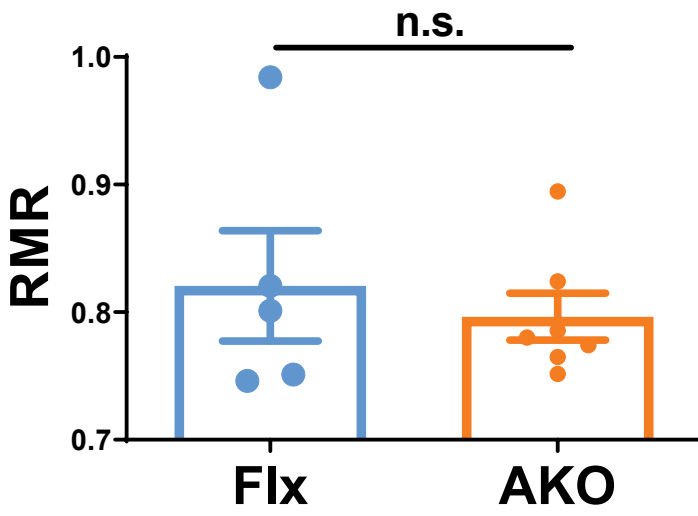



Supplementary Fig 7. **Adipose-specific *Tmem127* deletion and hepatic insulin signaling.** A) Western blot of liver lysates of Flx or AKO chow-fed, adult male (n=3 per genotype), probed with phosphorylated Akt at Ser473 or Thr308 or total Akt; B) Western blot of liver lysates of Flx (n=3); LKO (n=4); AKO (n=3), and one WT and one KO adult male, chow fed samples, probed with Rictor or Tubulin; C) Resting metabolic rate (RMR) calculated from the five lowest values of the adjusted oxygen consumption (VO<sub>2</sub>) in mL/hr/g lean body mass in 24h of Flx (n=5) and AKO (n=7) chow-fed, adult male mice. Data were analyzed by two-way ANOVA (n.s., non-significant). Source data are provided as a Source Data file.

— PAM  
— gRNA

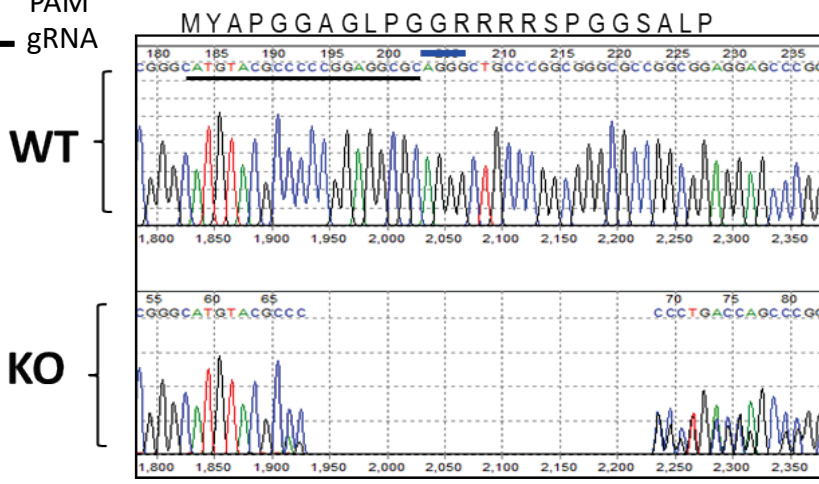

Supplementary Fig 8. **Characterization of CRISPR-Cas9 mediate-*TMEM127*KO HepG2 cells.** Sanger sequencing of a HepG2 clone carrying a heterozygous deletion of exon 2 of the *TMEM127* gene (KO). Guide RNA sequence is indicated with a black bar and PAM sequence is indicated with a blue bar.

A

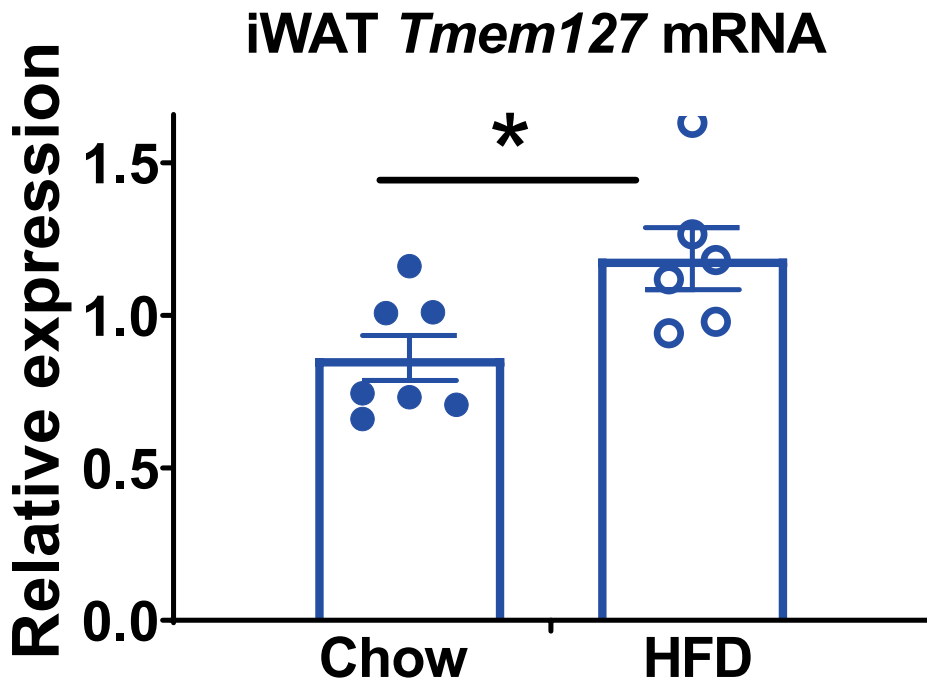

B

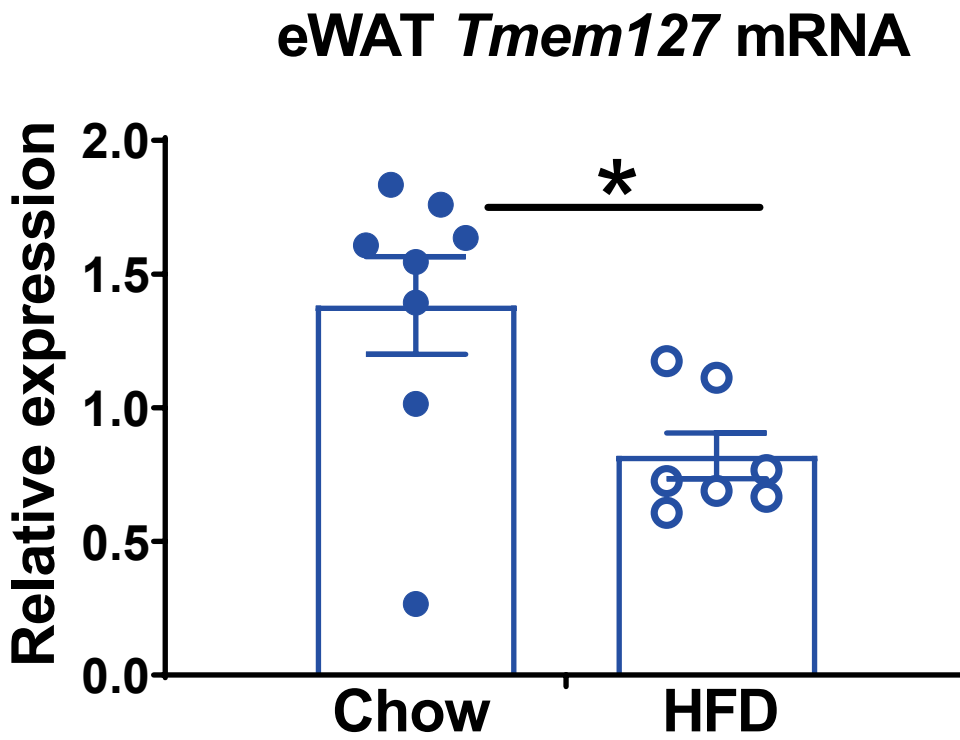

Supplementary Fig 9. *Tmem127* mRNA expression of in fat tissues of wild-type adult male mice under chow or high-fat diet (HFD), quantified by real time PCR and displayed as relative expression normalized to the *Tfiib* gene: A) results from inguinal white adipose tissue (iWAT; n= chow n=7; HFD n=6; B) results from epididymal white adipose tissue (eWAT; chow n=8; HFD n=7). Data were analyzed by Student's t test; \*p<0.05. Source data are provided as a Source Data file.

Supplementary Table 3- Liver TMEM127 mRNA levels and metabolic parameters in patients with fatty liver disease

| Variable     | Overall P | NAFLD+NASH P | NASH P |
|--------------|-----------|--------------|--------|
| Age          | 0.052     | 0.058        | 0.201  |
| BMI          | 0.019     | 0.038        | 0.041  |
| AST          | 0.798     | 0.703        | 0.679  |
| ALT          | 0.877     | 0.796        | 0.379  |
| Insulin      | 0.005     | 0.018        | 0.036  |
| Hba1C        | 0.019     | 0.004        | 0.544  |
| Cholesterol  | 0.138     | 0.294        | 0.904  |
| Triglyceride | 0.015     | 0.075        | 0.307  |
| INR          | 0.716     | 0.323        | 0.656  |
| Glucose      | 0.096     | 0.277        | 0.934  |
| Weight       | 0.838     | 0.693        | 0.894  |
| HOMA-IR      | 0.011     | 0.050        | 0.203  |
| NAFLD SCORE* | 0.349     | 0.297        | 0.449  |

P values (Spearman's Correlation Coefficient) of TMEM127 expression: 'Overall P': all groups combined controls vs. nonalcoholic fatty liver disease (NAFLD) vs. nonalcoholic steatohepatitis (NASH); 'NAFLD + NASH P', combined NAFLD and NASH vs. control; 'NASH P', NASH only vs control; HOMA-IR= homeostatic model assessment of insulin resistance, BMI= body mass index; AST= aspartate amino transferase, ALT= alanine amino transferase; \*As reported in Ref (29) Harrison et al. Gut 57, 1441-7 (2008)

Supplementary Table 4. Clinical, metabolic and molecular features of the cohort of patients with fatty acid liver disease

| Disease Status | Fibrosis Stage | TMEM127 read counts* | T2DM | Insulin ( $\mu$ U/L) | HOMA-IR | BMI   |
|----------------|----------------|----------------------|------|----------------------|---------|-------|
| Control        | 0              | 496.23               | Yes  | 7.90                 | 2.03    | 36.27 |
| Control        | 0              | 147.16               | No   | 9.40                 | 2.20    | 35.42 |
| Control        | 0              | 416.00               | Yes  | 10.80                | 0.00    | 31.00 |
| Control        | 0              | 491.94               | No   | 15.80                | 4.41    | 31.01 |
| Control        | 0              | 283.59               | No   |                      |         | 28.23 |
| Control        | 0              | 343.43               | No   | 1.20                 | 0.29    | 26.38 |
| Control        | 0              | 385.07               | No   | 5.40                 | 0.00    |       |
| NAFLD          | 0              | 490.08               | No   | 69.70                | 16.69   | 26.07 |
| NAFLD          | 0              | 426.05               | No   | 10.70                | 3.09    | 36.77 |
| NAFLD          | 0              | 489.00               | No   | 14.70                | 3.70    | 24.69 |
| NAFLD          | 0              | 530.73               | No   | 19.10                | 4.53    | 32.61 |
| NAFLD          | 0              | 495.23               | No   | 7.00                 | 1.69    | 29.99 |
| NAFLD          | 0              | 426.00               | No   | 17.40                | 3.87    | 33.12 |
| NAFLD          | 0              | 359.48               | No   | 11.40                | 2.42    | 32.38 |
| NAFLD          | 0              | 400.56               | No   | 44.40                | 10.63   | 25.60 |
| NAFLD          | 0              | 467.38               | No   | 7.60                 | 1.71    | 26.31 |
| NAFLD          | 0              | 444.05               | No   | 18.20                | 4.45    | 27.80 |
| NAFLD          | 0              | 160.92               | No   | 13.10                | 3.49    | 29.66 |
| NAFLD          | 0              | 471.48               | No   | 9.50                 | 2.56    | 29.02 |
| NAFLD          | 0              | 280.86               | No   | 14.00                | 3.28    | 30.27 |
| NAFLD          | 0              | 438.38               | No   | 7.40                 | 1.74    | 28.41 |
| NAFLD          | 0              | 456.75               | No   | 6.30                 | 1.28    | 30.38 |
| NAFLD          | 0              | 438.77               | No   | 23.70                | 5.79    | 31.75 |
| NAFLD          | 0              | 407.13               | No   | 16.60                | 3.89    | 28.17 |
| NAFLD          | 0              | 394.36               | Yes  | 21.70                | 7.34    | 30.02 |
| NAFLD          | 0              | 490.61               | No   | 9.60                 | 2.20    |       |
| NAFLD          | 0              | 503.62               | No   | 16.40                | 4.01    |       |
| NAFLD          | 0              | 438.35               | No   | 9.50                 | 2.58    |       |
| NASH           | 1              | 495.40               | No   | 15.00                | 3.93    | 27.61 |
| NASH           | 1              | 451.00               | No   | 26.70                | 6.13    | 32.93 |
| NASH           | 1              | 524.18               | No   | 116.40               | 38.23   | 37.49 |
| NASH           | 1              | 556.00               | No   | 52.60                | 12.08   | 36.71 |
| NASH           | 1              | 469.22               | No   | 27.30                | 6.40    | 31.16 |
| NASH           | 1              | 550.35               | No   | 41.30                | 11.63   | 36.67 |
| NASH           | 1              | 500.57               | Yes  | 35.20                | 13.99   | 37.27 |
| NASH           | 1              | 349.03               | No   | 32.50                | 9.15    | 35.44 |
| NASH           | 1              | 475.02               | Yes  | 235.20               | 66.79   | 36.65 |
| NASH           | 1              | 412.65               | No   | 25.70                | 6.79    | 27.55 |
| NASH           | 1              | 456.46               | No   | 8.70                 | 2.08    | 34.49 |
| NASH           | 1              | 435.18               | No   | 65.70                | 14.60   | 32.61 |
| NASH           | 1              | 471.56               | Yes  | 4.60                 | 0.99    | 26.88 |
| NASH           | 1              | 410.39               | No   | 8.40                 | 5.08    |       |
| NASH           | 1              | 500.28               | Yes  | 26.10                | 15.79   |       |
| NASH           | 1              | 484.91               | No   |                      |         |       |
| NASH           | 2              | 510.76               | No   | 17.60                | 3.69    | 32.61 |
| NASH           | 2              | 494.87               | No   | 13.10                | 3.11    | 25.62 |
| NASH           | 2              | 500.71               | Yes  | 41.00                | 10.43   | 27.53 |
| NASH           | 2              | 498.30               | Yes  | 28.90                | 7.99    |       |
| NASH           | 2              | 488.55               | Yes  | 24.70                | 9.51    |       |
| NASH           | 3              | 437.54               | Yes  | 22.60                | 13.23   | 31.35 |
| NASH           | 3              | 540.56               | No   | 39.20                | 10.55   | 31.47 |
| NASH           | 3              | 554.93               | Yes  | 12.70                | 3.54    | 37.56 |

NAFLD=nonalcoholic fatty liver disease, NASH= nonalcoholic steatohepatitis, T2DM= type 2 diabetes, HOMA-IR= homeostatic model assessment of insulin resistance, BMI= body mass index, \*normalized read counts

| Species | Primer Name     | Primer sequence             |
|---------|-----------------|-----------------------------|
| mouse   | Acly_F          | GCCAGCGGAGCACATC            |
| mouse   | Acly_R          | CTTTGCAGGTGCCACTTCATC       |
| mouse   | Acaca_F         | GCC TCT TCC TGA CAA ACG AG  |
| mouse   | Acaca_R         | TGA CTG CCG AAA CAT CTC TG  |
| mouse   | Acacb_F         | ACTCGCTTTGGAGGCAACAG        |
| mouse   | Acacb_R         | CGCAGCGATGCCATTGTGTG        |
| mouse   | Fasn_F          | CAG CAG AGT CTA CAG CTA CCT |
| mouse   | Fasn_R          | ACC ACC AGA GAC CGT TAT GC  |
| mouse   | Scd1_F          | CTGACCTGAAAGCCGAGAAG        |
| mouse   | Scd1_R          | GCGTTGAGCACAGAGTGTA         |
| mouse   | Elov16_F        | TGC TGC ATC CAG TTG AAG AC  |
| mouse   | Elov16_R        | TGC CAT GTT CAT CAC CTT GT  |
| mouse   | Cidea_F         | GCCTGCAGGAATTATCAGC         |
| mouse   | Cidea_R         | TGCTTGACACTGGGACATA         |
| mouse   | Cidec_F         | ATGGACTACGCCATGAAGTCT       |
| mouse   | Cidec_R         | CGGTGCTAACACGACAGGG         |
| mouse   | Ppara_F         | AACATCGAGTGTGAATATGTGG      |
| mouse   | Ppara_R         | CCGAATAGTTCCGCCGAAAGAA      |
| mouse   | Cpt1a_F         | AGGGCCGATCATGGTTAACA        |
| mouse   | Cpt1a_R         | CGTGTGGATGGTGTCTGTC         |
| mouse   | Acadm_F         | AGGTTTCAAGATCGCAATGG        |
| mouse   | Acadm_R         | ACCTTCATGCCATTCTGC          |
| mouse   | Cd36_F          | ATTTCATGCCAGTCGGAGA         |
| mouse   | Cd36_R          | TGGGTTTTGCACATCAAGA         |
| mouse   | Glut2_F         | GGCTAATTTCAGACTGGTT         |
| mouse   | Glut2_R         | TTTCTTTGCCCTGACTTCCT        |
| mouse   | Gck_F           | ATGGCTGTGGATACTACAAGGA      |
| mouse   | Gck_R           | TTCAGGCCACGGTCCATCT         |
| mouse   | G6Pase_F        | TGCTGCTCACTTTCCACCAG        |
| mouse   | G6Pase_R        | TCTCAAAGTCCACAGGAGGT        |
| mouse   | Pepck1_F (Pck1) | GACAGCCTGCCCCAGGCAGTGA      |
| mouse   | Pepck1_R (Pck1) | CTGGCCACATCTCGAGGGTCAG      |
| mouse   | Glut4_F         | GTGACTGGAACTGGTCTTA         |
| mouse   | Glut4_R         | CCAGCCACGTTTGATTGTAG        |
| mouse   | Srebf1_F        | GATCAAAGGAGGACAGTG          |
| mouse   | Srebf1_R        | TAGATGGTGGCTGTGAGTG         |
| mouse   | Chrebptotal_F   | CACTCAGGGAATACACGCCTAC      |
| mouse   | Chrebptotal_R   | ATCTTGCTTTAGGGTCTCAGG       |
| mouse   | Chrebpa_F       | CGACACTCACCCACCTCTTC        |
| mouse   | Chrebpa_R       | TTGTTACGCCGATCTTGTC         |
| mouse   | Chrebpb_F       | TCTGCAGATCGCGTGGAG          |
| mouse   | Chrebpb_R       | CTTGTCGCCGATAGCAAC          |
| mouse   | Nr1h2_F         | ATAGTGGGTACGAAGCAGC         |
| mouse   | Nr1h2_R         | AGGGCAACAGAGTCGGAGAC        |
| mouse   | Nr1h3_F         | AGGAGTGTGACTTCGCAAA         |
| mouse   | Nr1h3_R         | CTCTTCTGCCGCTTCAGTTT        |
| mouse   | Cebpa_F         | CAAGAACAGCAACGAGTACCG       |
| mouse   | Cebpa_R         | GTCACTGGTCACTCCAGCAC        |
| mouse   | Tfiib_F         | TGGAGATTTGCCACCATGA         |
| mouse   | Tfiib_R         | GAATTGCCAAACTCATCAAACT      |
| mouse   | Pdk1_F          | GGCGGCTTTGTGATTGTAT         |
| mouse   | Pdk1_R          | ACCTGAATCGGGGATAAAC         |
| mouse   | Pfkip-F         | AGGAGGGCAAGGAGGTGTT         |
| mouse   | Pfkip-R         | TTGGCAGAAATCTTGGTTCC        |
| mouse   | Pgd-F           | AGACAGGCAGCCACTGAGTT        |
| mouse   | Pgd-R           | AAGTTCTGGGTTTCGCTCAA        |
| mouse   | Gapdh_F         | AGGTGCGGTGAAACGGAATTTG      |
| mouse   | Gapdh_R         | TGTAGACCATGTAGTTGAGGTCA     |
| mouse   | Tmem127_3F      | TCGGTATGCCTTTGCTCACATCCT    |
| mouse   | Tmem127_4R      | ACTTCTATGCTGTGCTGCTGGG      |
| human   | ACC1_R          | AGTGGGTCAACCCATTGTT         |
| human   | ACC1_F          | TTCTAACAGGAGCTGGAGCC        |
| human   | FASN_R          | TCTCCGACTCTGGCAGCTT         |
| human   | FASN_F          | GCTCCAGCCTCGCTCTC           |
| human   | SCD1_R          | GCAGCCGAGCTTTGTAAGAG        |
| human   | SCD1_F          | GTCTACACCTGGCTTTGGG         |
| human   | ELOVL6_R        | GTCTCTGACCCTTGCACTCTT       |
| human   | ELOVL6_F        | CCTGGTCAAACTGACTGCT         |
| human   | SREBF1c_F       | AAAAATCCGCCGCGCT            |
| human   | SREBF1c_R       | GCATGTCTTCGAAAGTGCAA        |
| human   | CHREBPb_F       | AGCCAGCCTCAAGGAGC           |
| human   | CHREBPb_R       | CTGCTGGCAGGTTAATGG          |
| human   | LXRB_F          | CGCTACAACCAGGACAGA          |
| human   | LXRB_R          | GAACCTGAAGATGGGGTTGA        |
| human   | LXRA_F          | GAAGAACTGAAGCGGCAAGA        |
| human   | LXRA_R          | ACTCGAAGCGGTCAGAAAA         |
| human   | TBP_F           | TATAATCCCAAGCGTTTGTGCG      |
| human   | TBP_R           | AATTGTTGGTGGTGAGCACAAAGG    |
| human   | G6PASE_F (G6PC) | ACTGGCTCAACCTCGTCTTTA       |
| human   | G6PASE_R (G6PC) | CGGAAAGTGTGCTGTAGTAGTCA     |
| human   | TMEM127_F       | TCGGTATGCCTTTGCTCACATCCT    |
| human   | TMEM127_R       | ACTTCTATGCTGTGCTGCTGGG      |
